# Supplementary material for: Hemin–amino acid co-assembly nanozymes with dual enzyme-mimicking activities for in situ oxygen generation-enhanced one-step biosensing of glucose and H2O2
Source: Royal Society of Chemistry journal article supplement (doi:10.1039/d6ra00649c), 2026-05-26
Supplement: d6ra00649c1.pdf [file d6ra00649c1.pdf]

## Support Information

### 1. Materials and methods

#### 1.1. Materials

FMOC-histidine, Hemin, DMSO, 2,2'-azinobis-(3-ethylbenzthiazoline-6-sulfonic acid) (ABTS), 3,3',5,5'-tetramethylbenzidine (TMB), 1,2-diaminobenzene (OPD), GOx was purchased from Macklin reagent Co., Ltd. (Shang-hai, China). MnCl<sub>2</sub> and FeCl<sub>3</sub> were purchased from Sinopharm Chemical Reagent Co. Ltd. Glucose, fructose, maltose, arabinose, xylose and galactose were purchased from Sigma-Aldrich, and the purity was greater than that 98%. All solutions prepared are derived from Wahaha purified water (China). All other chemicals were of the highest grade and used without further purification unless otherwise noted.

#### 1.2. Instrumentation

Scanning electron microscopy (SEM) was conducted using Hitachi FE-SEM S-4800 at 3 kV. X-ray photoelectron spectroscopy (XPS) spectra were measured using Thermo ESCALAB 250Xi. Inductively coupled plasma spectrometer (ICP-OES) was measured by Agilent 725. The dissolved oxygen meter was operated with Mettler Toledo M400. UV-vis spectra were recorded on the UV-2700 spectrophotometer manufactured by Shimadzu (Japan).

#### 1.3. Analysis of POD-like and CAT-like activity of Fe-His@Hemin

Fe-His@Hemin with POD-like activity can directly oxidize substrates in the presence of H<sub>2</sub>O<sub>2</sub>. The whole reaction system consists of 60 μL of 0.10 mg mL<sup>-1</sup> Fe-His@Hemin, 50 μL H<sub>2</sub>O<sub>2</sub> (1 mM) and 100 μL of 3 mM, TMB were added to 790 μL of 0.1M Tris-HCl buffer solution (pH 8.0). Finally, the mixed system was reacted at 25 °C for 10 min and the UV absorption was measured at 652 nm.

The CAT-like activity was measured by monitoring the production of O<sub>2</sub> with dissolved oxygen meter by decomposition H<sub>2</sub>O<sub>2</sub>. In brief, Fe-His@Hemin solution (40 μL, 1 mg mL<sup>-1</sup>) and H<sub>2</sub>O<sub>2</sub> (40 μL, 30% H<sub>2</sub>O<sub>2</sub>) were added to Tris-HCl buffer (0.1 M, pH 8.0, 920 μL). The content of O<sub>2</sub> was detected every 1 min for 10 min.

#### 1.4. Steady-State Kinetic Analysis

Kinetic experiments were carried out in a reaction volume of 1.0 mL Tris-HCl

buffer (0.1 M, pH 8.0) containing nanozyme (60  $\mu\text{L}$ , 0.1  $\text{mg mL}^{-1}$ ),  $\text{H}_2\text{O}_2$  (50  $\mu\text{L}$ , 1mM) and TMB (100  $\mu\text{L}$ , 3 mM). The solution mixtures were incubated at 25 °C for 10 min and then used for the absorbance measurement at a wavelength of 652 nm.

The kinetic parameters are determined by the following equations:  $1/v = K_m/V_{\text{max}} \times (1/[S] + 1/K_m)$ , where  $v$  is the initial velocity,  $V_{\text{max}}$  is the maximal reaction velocity, and  $[S]$  is the concentration of the substrate.  $K_m$  is the Michaelis–Menten constant, which indicates the enzyme affinity for the substrate.

### ***1.5. One-step colorimetric detection of $\text{H}_2\text{O}_2$ and glucose based on the Fe-His@Hemin CAT-like***

$\text{H}_2\text{O}_2$  detection was performed as follows: 60  $\mu\text{L}$  Fe-His@Hemin (0.1  $\text{mg mL}^{-1}$ ), 100  $\mu\text{L}$  TMB (3 mM) and 50  $\mu\text{L}$  of different concentrations of  $\text{H}_2\text{O}_2$  in 790  $\mu\text{L}$  Tris-HCl buffer (0.1 M, pH 8.0) was incubated at 25 °C for 10 min and then used for the absorbance measurement at a wavelength of 652 nm.

Glucose detection was performed as follows: 50  $\mu\text{L}$  GOx (5  $\text{mg mL}^{-1}$ ), 60  $\mu\text{L}$  Fe-His@Hemin (0.1  $\text{mg mL}^{-1}$ ), 100  $\mu\text{L}$  TMB (3 mM) and 200  $\mu\text{L}$  of different concentrations of glucose in 590  $\mu\text{L}$  HAc-NaAc buffer solution (0.1 M, pH 6.0) was incubated at 37 °C for 30 min and then used for the absorbance measurement at a wavelength of 652 nm.

### ***1.6. Detection of glucose in human serum***

The human serum utilized in this study was procured from the blood bank of the First Affiliated Hospital of Jilin University. All experiments were performed in accordance with the Guidelines “Declaration of Helsinki (as revised in 2013)”, and approved by the ethics committee at “the Institutional Ethics Committee of the First Affiliated Hospital of Jilin University”. Informed consents were obtained from human participants of this study. The collected serum was diluted 50-fold and the detection method of glucose was performed in accordance with 2.6 section (***One-step colorimetric detection of  $\text{H}_2\text{O}_2$  and glucose based on the Fe-His@Hemin CAT-like***) and the absorbance of the solution at 652 nm were recorded by UV-vis spectroscopy.

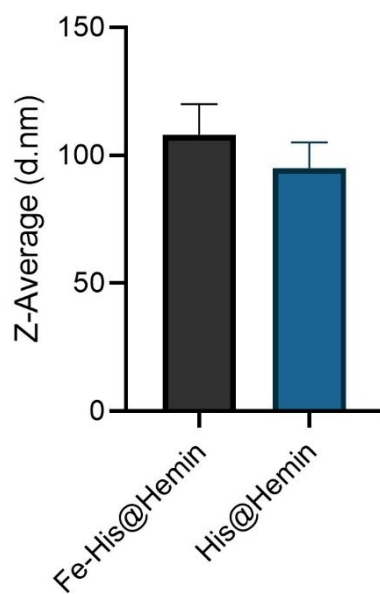

**Fig S1.** The hydrodynamic diameters of Fe-His@Hemin and His@Hemin detected by dynamic light scattering.

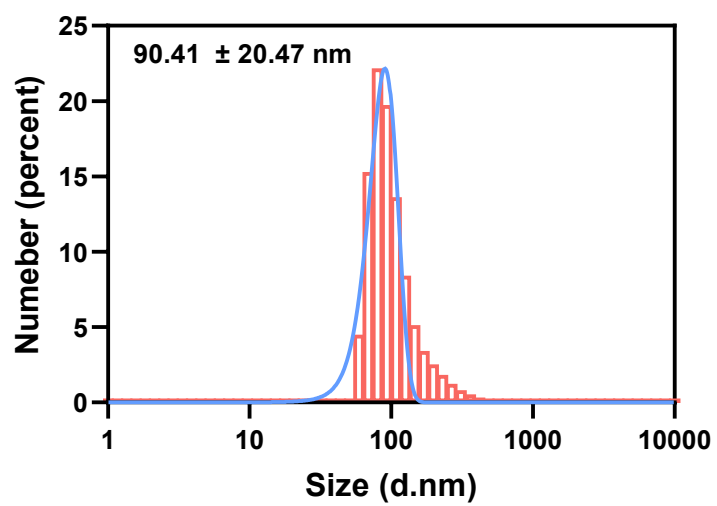

**Fig S2.** The particle size distribution diagram of Fe-His@Hemin nanozymes.

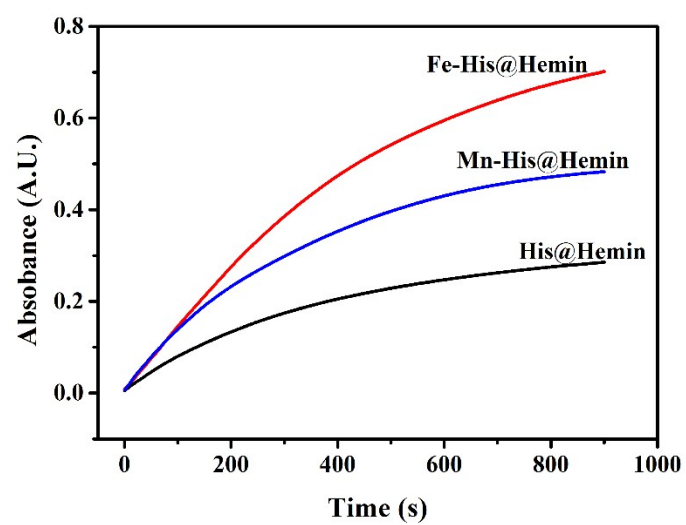

**Fig S3.** Time-dependent absorbance of Fe-His@Hemin, Mn-His@Hemin, His@Hemin at 652 nm.

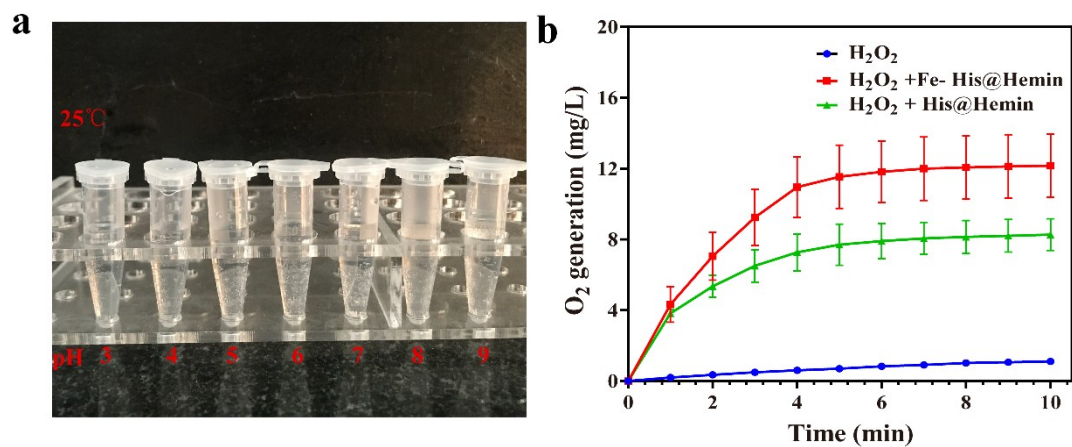

**Fig S4.** Investigate the catalase-like activity of Fe-His@Hemin. (a) Effects of different pH on catalase-like activities of Fe-His@Hemin at 25 °C ; (b)  $\text{O}_2$  generation from  $\text{H}_2\text{O}_2$  decomposition with  $\text{H}_2\text{O}_2 + \text{Fe-His@Hemin}$  and  $\text{H}_2\text{O}_2 + \text{His@Hemin}$ .

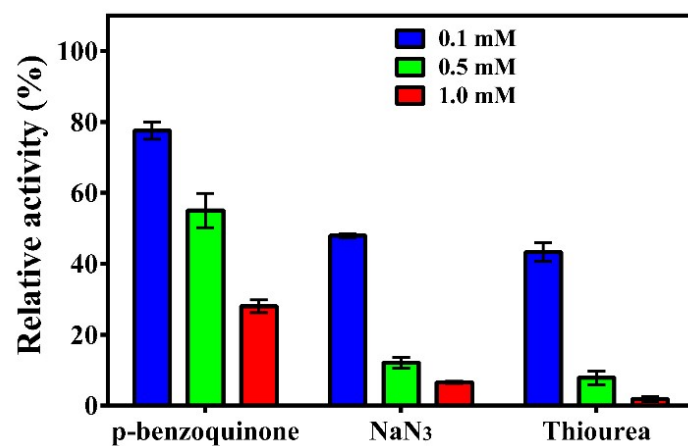

**Fig S5.** Effects of different concentrations of free radical traps on dual-enzyme activity of Fe-His@Hemin (Conditions: 6  $\mu\text{g}/\text{mL}$  Fe-His@Hemin, 0.3 mM TMB, 0.1 M pH 8.0 Tris-HCl buffer, 10 min and 25°C). The error bars are the standard deviation of the third parallel sample.

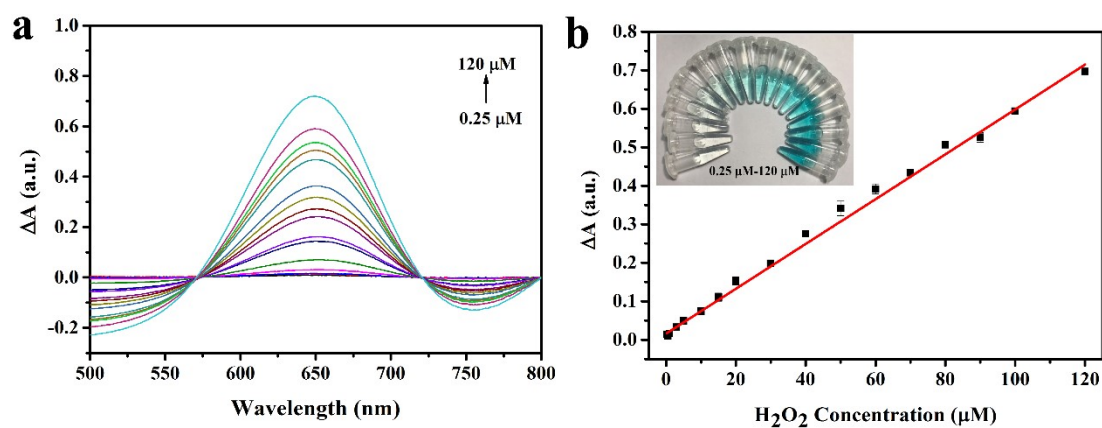

**Fig S6.** Sensitivity research of H<sub>2</sub>O<sub>2</sub> colorimetric sensing platform based on Fe-His@Hemin. (a) The UV-vis absorption curves of Fe-His@Hemin and TMB with different concentrations of H<sub>2</sub>O<sub>2</sub> (0.25-120 μM); (b) Linear plots of ΔA versus H<sub>2</sub>O<sub>2</sub> concentration (Inset: corresponding color changes of 0.25-120 μM H<sub>2</sub>O<sub>2</sub> in the reaction system). Error bars denote standard deviations based on three measurements.

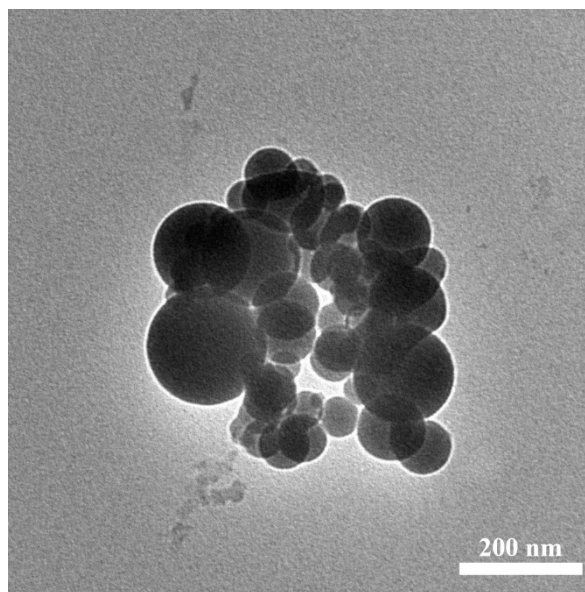

**Figure S7. TEM image of Mn-His@Hemin.** The scale bar is 200 nm. The sample exhibits a nanoparticulate aggregate structure with particle sizes ranging from approximately 80 to 150 nm.

**Table S1.** Comparison of the  $K_M$  and  $V_{max}$  values with other peroxidase mimetics.

| Catalysts    | $K_M$ (mM)                    |       | $V_{max}$ (M s <sup>-1</sup> ) |                       | Refs.     |
|--------------|-------------------------------|-------|--------------------------------|-----------------------|-----------|
|              | H <sub>2</sub> O <sub>2</sub> | TMB   | H <sub>2</sub> O <sub>2</sub>  | TMB                   |           |
| HRP          | 3.7                           | 0.434 | 8.71×10 <sup>-8</sup>          | 1.0×10 <sup>-7</sup>  | [1]       |
| Hem-Au@apoHb | 2.05                          | 0.27  | 13.1×10 <sup>-8</sup>          | 13.6×10 <sup>-8</sup> | [2]       |
| Hemin        | 4.84                          | 2.74  | 4.69×10 <sup>-8</sup>          | 3.53×10 <sup>-8</sup> | [3]       |
| Hemin@ZIF-8  | 1.96                          | 0.38  | 8.11×10 <sup>-8</sup>          | 6.63×10 <sup>-8</sup> | [4]       |
| AB-Hemin     | 1.71                          | 0.68  | 9.05×10 <sup>-8</sup>          | 5.56×10 <sup>-8</sup> | [5]       |
| Fe-His@Hemin | 1.07                          | 0.25  | 1.08×10 <sup>-5</sup>          | 1.24×10 <sup>-6</sup> | This work |
| Mn-His@Hemin | 1.13                          | 0.14  | 9.81×10 <sup>-6</sup>          | 5.08×10 <sup>-7</sup> | This work |
| His@Hemin    | 5.52                          | 0.15  | 1.01×10 <sup>-5</sup>          | 6.12×10 <sup>-7</sup> | This work |

**Table S2.** Comparison of different sensors for H<sub>2</sub>O<sub>2</sub> determination

| Materials                            | Linear<br>rang( $\mu\text{M}$ ) | LOD ( $\mu\text{M}$ ) | Method      | Refs.     |
|--------------------------------------|---------------------------------|-----------------------|-------------|-----------|
| PtNP/g-C <sub>3</sub> N <sub>4</sub> | 50-200                          | 3.33                  | colorimetry | [6]       |
| MXene@Fe <sub>3</sub> O <sub>4</sub> | 0.4-12                          | 0.15                  | colorimetry | [7]       |
| Pd NPs                               | 1-50                            | 0.35                  | colorimetry | [8]       |
| CAT@Fe-BTC                           | 8-60                            | 5.5                   | colorimetry | [9]       |
| Fe@CNs                               | 5-200                           | 2.04                  | colorimetry | [10]      |
| Fe-His@Hemin                         | 0.25-120                        | 0.16                  | colorimetry | This work |

**Table S3.** Comparison of different sensors for glucose determination

| Materials                            | Linear<br>rang( $\mu\text{M}$ ) | LOD ( $\mu\text{M}$ ) | Method      | Refs.     |
|--------------------------------------|---------------------------------|-----------------------|-------------|-----------|
| ZnIrOx/ZnIrMOFs                      | 2.66 -319                       | 1.9                   | colorimetry | [11]      |
| CuO NPs                              | 10-100                          | 5.06                  | colorimetry | [12]      |
| CuFe@TA                              | 3.03-363.6                      | 2.59                  | colorimetry | [13]      |
| NO <sub>2</sub> -MIL-53(Cu)          | 0.5-300                         | 2.6                   | colorimetry | [14]      |
| N-CDs/Fe <sub>3</sub> O <sub>4</sub> | 1-180                           | 0.56                  | colorimetry | [15]      |
| Fe-His@Hemin                         | 0.5-400                         | 0.25                  | colorimetry | This work |

## **References**

- [1] Gao L Z, Zhuang J, Nie L, et al. Intrinsic peroxidase-like activity of ferromagnetic nanoparticles [J]. *Nature Nanotechnology*, 2007, 2(9):577-583.
- [2] L. Y. Zhang, S. Li, M. M. Dong, Y. Jiang, R. Li, S. Zhang, X. X. Lv, L. J. Chen, H. Wang, *Biosens. Bioelectron.* 2017, 87, 1036.
- [3] Vernekar A A, Sinha D, Srivastava S, et al. An antioxidant nanozyme that uncovers the cytoprotective potential of vanadia nanowires[J]. *Nature Communications*, 2014, 5.
- [4] Sang X .An efficient enzyme cascade bio-platform based on metal-organic frameworks nanozyme for the detection of glucose[J].*Journal of the Chinese Chemical Society*, 2024, 71(2).
- [5] Yi X, Yuan Y, Qing M, Wang L, Li H, Bai L. Smartphone and paper-based device for glucose monitoring using acetylene black-hemin nanozyme as catalyst. *Spectrochim Acta A Mol Biomol Spectrosc.* 2023 Aug 5; 296: 122667.
- [6] Yang G, Chen Y, Shi R, Chen R, Gao S, Zhang X, Rao Y, Lu Y, Peng Y, Qing Z, Song C. Platinum Nanoparticles Loaded Graphitic Carbon Nitride Nanosheets with Enhanced Peroxidase-like Activity for H<sub>2</sub>O<sub>2</sub> and Oxidase-Based Sensing. *Molecules.* 2023 Apr 26;28(9):3736.
- [7] Wang J, Xu W, Zhou L, Zhang T, Yang N, Wang M, Luo X, Jin L, Zhu H, Ge W. Sensitive colorimetric sensing of glutathione and H<sub>2</sub>O<sub>2</sub> based on enhanced peroxidase mimetic activity of MXene@Fe<sub>3</sub>O<sub>4</sub>. *Mikrochim Acta.* 2022 Nov 21;189(12):452.
- [8] Seku K, Pejjai B, Osman AI, Hussaini SS, Al-Abri M, Swathi R, Hussain M, Kumar NS, Al-Fatesh AS, Bhagavanth Reddy G. Microwave-assisted synthesis of Limonia acidissima Groff gum stabilized palladium nanoparticles for colorimetric glucose sensing. *J Colloid Interface Sci.* 2024 Apr; 659:718-727.
- [9] Jing Y, Li J, Zhang X, Sun M, Lei Q, Li B, Yang J, Li H, Li C, Yang X, Xie L. Catalase-integrated metal-organic framework with synergetic catalytic activity for colorimetric sensing. *Environ Res.* 2022 May 1; 207:112147.
- [10] Wang J, Zhao C, Zhou F, Lu H, Huang Z, Yao C, Song C. Dual mimic enzyme properties of Fe nanoparticles embedded in two-dimensional carbon nanosheets for

- colorimetric detection of biomolecules. *Analyst*. 2022 Dec 20;148(1):146-152.
- [11] Xin J, Shu C, Fu Y, Yu X, Wang Z, Zeng X, Wang R, Meng T, Sun J, Yan M. MOF-confined ultrafine nanozymes with enhanced catalysis for sensitive colorimetric detection of glucose. *Talanta*. 2025 Feb 1; 283: 127152.
- [12] Aggarwal P, Rana J S, Chitkara M, et al. Sustainable Synthesis of CuO Nanoparticles for Colorimetric Detection of Hydrogen Peroxide and Glucose[J]. *Journal of Cluster Science*, 2024, 35(6):2093-2103.
- [13] Xin J, Yan M, Wang Z, et al. Bimetallic synergistic regulation of CuFe@TA nanozyme targeted boosting multi-enzymes activities for sensitive colorimetric detection of glucose[J]. *Microchemical Journal*, 2025, 209.
- [14] Wang Y, Wei Y, Li S, Hu G. A Nitro Functionalized MOF with Multi-Enzyme Mimetic Activities for the Colorimetric Sensing of Glucose at Neutral pH. *Sensors (Basel)*. 2023 Jul 10;23(14):6277.
- [15] Huang Y, Ding Z, Li Y, Xi F, Liu J. Magnetic Nanozyme Based on Loading Nitrogen-Doped Carbon Dots on Mesoporous Fe<sub>3</sub>O<sub>4</sub> Nanoparticles for the Colorimetric Detection of Glucose. *Molecules*. 2023 Jun 6;28(12):4573.
